# Supplementary material for: Hypervalent iodine-based dynamic and self-healing network polymers
Source: Royal Society of Chemistry journal article supplement (doi:10.1039/c9py00664h), 2019-01-01
Supplement: c9py00664h1.pdf [file c9py00664h1.pdf]

# Hypervalent Iodine-Based Dynamic and Self-Healing Network Polymers

Avichal Vaish and Nicolay V. Tsarevsky\*

Department of Chemistry, Southern Methodist University, Dallas, TX, USA 75275

## SUPPORTING INFORMATION

### Table of Contents

|                                                                             |   |
|-----------------------------------------------------------------------------|---|
| 1. Polymerization kinetics .....                                            | 2 |
| 2. Conversion of poly(Sty- <i>co</i> -tBA) to poly(Sty- <i>co</i> -AA)..... | 3 |
| 3. Effect of nucleophiles and reducing agents.....                          | 3 |
| 4. Conversion of dynamic to permanent gels.....                             | 4 |
| 4.1. Thermal curing .....                                                   | 4 |

## 1. Polymerization kinetics

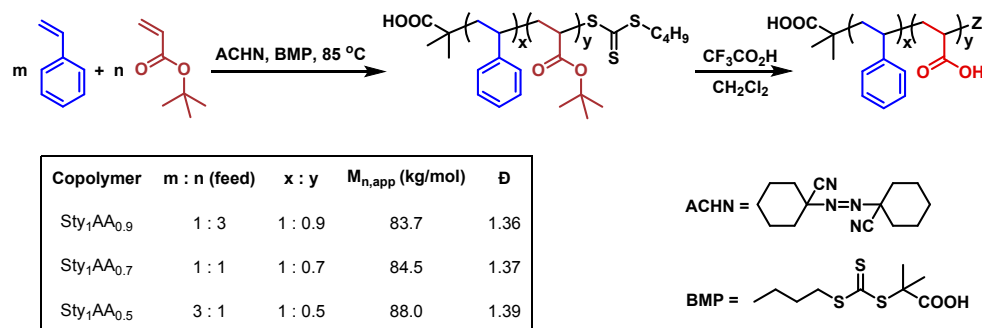

**Scheme S1.** Synthesis of carboxylate group-containing copolymers by copolymerization of Sty and tBA under RAFT polymerization conditions, followed by deprotection of the tert-butyl ester groups in the presence of  $\text{CF}_3\text{CO}_2\text{H}$ .

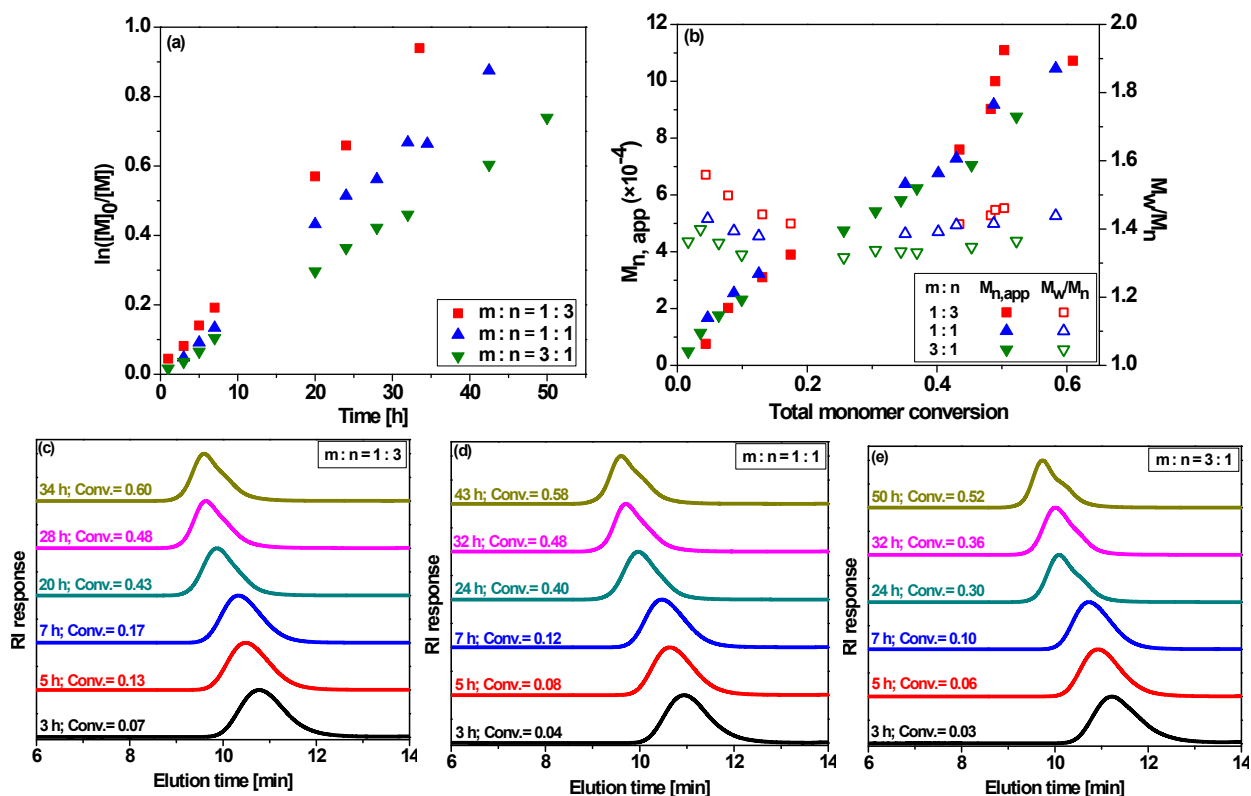

**Figure S1.** Kinetics of RAFT copolymerization of Sty and tBA (a); evolution of  $M_{n,app}$  and  $M_w/M_n$  with monomer conversion (b) and evolution of SEC traces of the polymers obtained using feed molar ratios of Sty and tBA equal to 1:3 (c), 1:1 (d), and 3:1 (e). The reaction times and monomer conversions are shown at each curve.

## 2. Conversion of poly(Sty-*co*-tBA) to poly(Sty-*co*-AA)

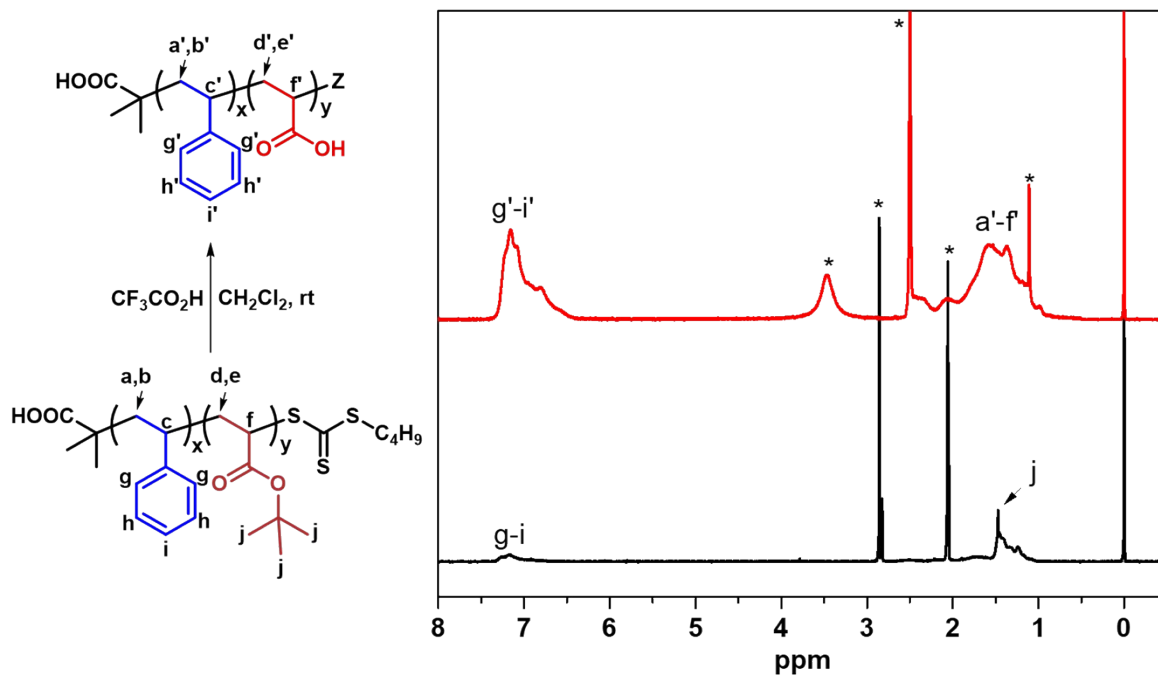

**Figure S2.** <sup>1</sup>H NMR spectra of poly(Sty-*co*-tBA) (bottom) and poly(Sty-*co*-AA) (top) in acetone-*d*<sub>6</sub> and DMSO-*d*<sub>6</sub>, respectively. The peaks marked with asterisks belong to residual solvents.

## 3. Effect of nucleophiles and reducing agents

To demonstrate the ability of nucleophiles to cause polymer degradation via ligand-exchange, a gel was prepared by mixing PhI(O<sub>2</sub>CCH<sub>3</sub>)<sub>2</sub> (0.15 M) and Sty<sub>1</sub>AA<sub>0.9</sub> (0.73 M with respect to carboxylate groups) solutions in DMAc along with a trace amount of indigo carmine. Subsequently, 200 μL of saturated NaN<sub>3</sub> solution in DMAc was added to the gel. The gel degraded within 6 h, as shown in Figure S3a-b.

In a separate experiment, 200 μL of Bu<sub>3</sub>P (nucleophile and reducing agent) was added to a gel with the same composition as above. The network degraded completely within 45 min (Figure S3c-d).

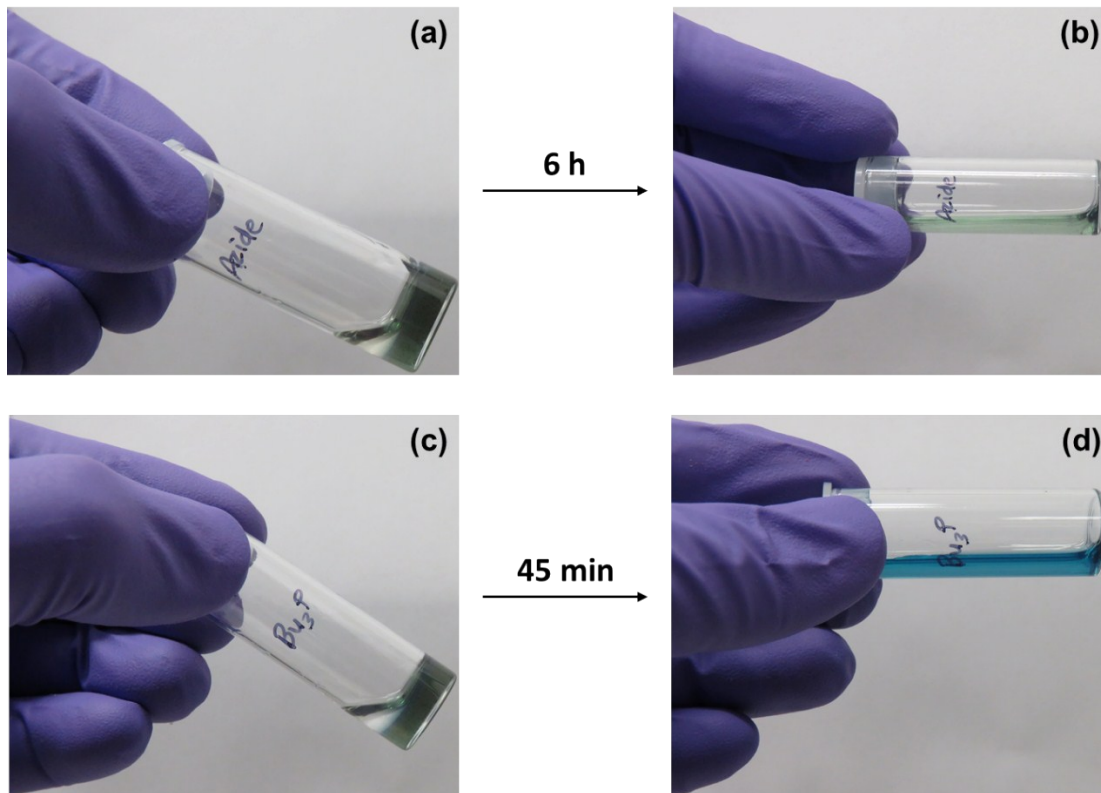

**Figure S3.** Gels with (diacyloxyiodo)benzene-type groups at the crosslinks treated with  $\text{NaN}_3$  solution (a, b) or  $\text{Bu}_3\text{P}$  (c, d). The first picture in each case shows the gel right after the addition of the reagent, and the second picture shows the degraded gel after the specified time.

#### 4. Conversion of dynamic to permanent gels

##### 4.1. Thermal curing

Gels were prepared by mixing 300  $\mu\text{L}$  of  $\text{Sty}_1\text{AA}_{0.9}$  solution (0.21 M with respect to carboxylate groups) with 200  $\mu\text{L}$  of  $\text{PhI}(\text{O}_2\text{CCH}_3)_2$  solution (0.10 M) in 1,4-dioxane in a microwave tube, which was then kept in a microwave reactor at 200  $^\circ\text{C}$  for 2 min. The power set to 300 W and the timer was started when the temperature reached at 200  $^\circ\text{C}$ . The total reaction time (including heating and cooling) was 40 min. After the reaction, the gel was washed 1,4-dioxane ( $2 \times 500 \mu\text{L}$ ), which was discarded and then 100  $\mu\text{L}$  of  $\text{CH}_3\text{CO}_2\text{H}$  along with 500  $\mu\text{L}$  of

1,4-dioxane were added to the tube (Figure S4a). The gel remained intact even after 72 h (Figure S4b), which proved the formation of permanent crosslinks during the thermal treatment.

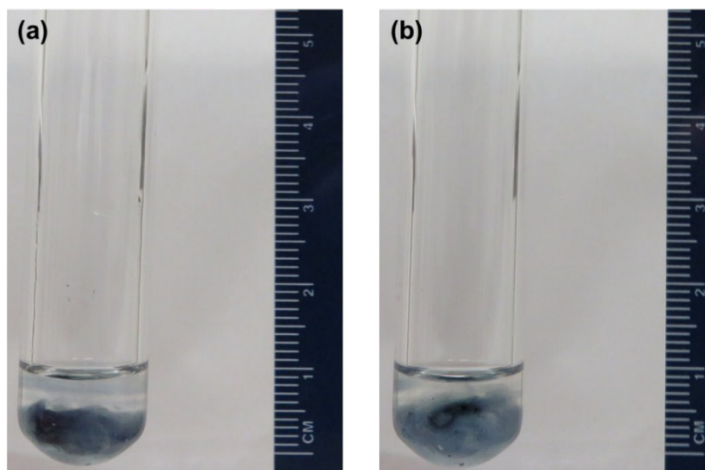

**Figure S4.** Set gel prepared by microwave heating of dynamic gel just after the addition of  $\text{CH}_3\text{CO}_2\text{H}$  (a) and 72 h later (b).
